# Supplementary figures and images for: Development of novel clinical examination scales for the measurement of disease severity in Creutzfeldt-Jakob disease
Source: HighWire-hosted journal article supplement (doi:10.1136/jnnp-2021-327722), 2022-01-12

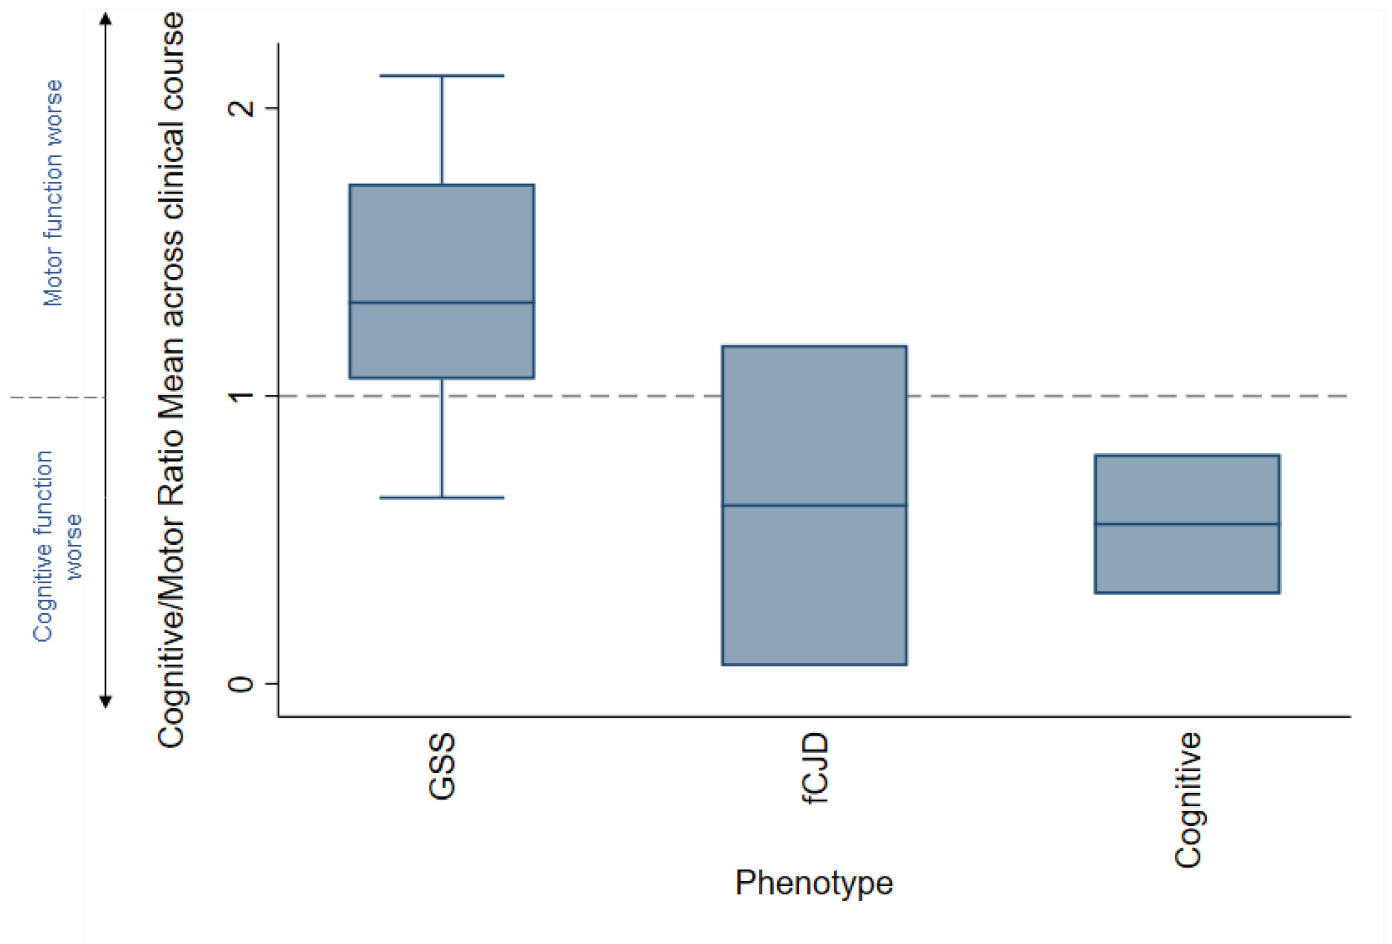

Supplement: jnnp-2021-327722supp001_data_supplement.pdf [file jnnp-2021-327722supp001_data_supplement.pdf]
